# Supplementary material for: Design and Experimental Application of a Novel Non-Degenerate Universal Primer Set that Amplifies Prokaryotic 16S rRNA Genes with a Low Possibility to Amplify Eukaryotic rRNA Genes
Source: PubMed Central journal article supplement (PMC3989492; doi:10.1093/dnares/dst052), 2013-11-25
Supplement: supp_dst052_dst052supp_fig1.pdf [file supp_dst052_dst052supp_fig1.pdf]

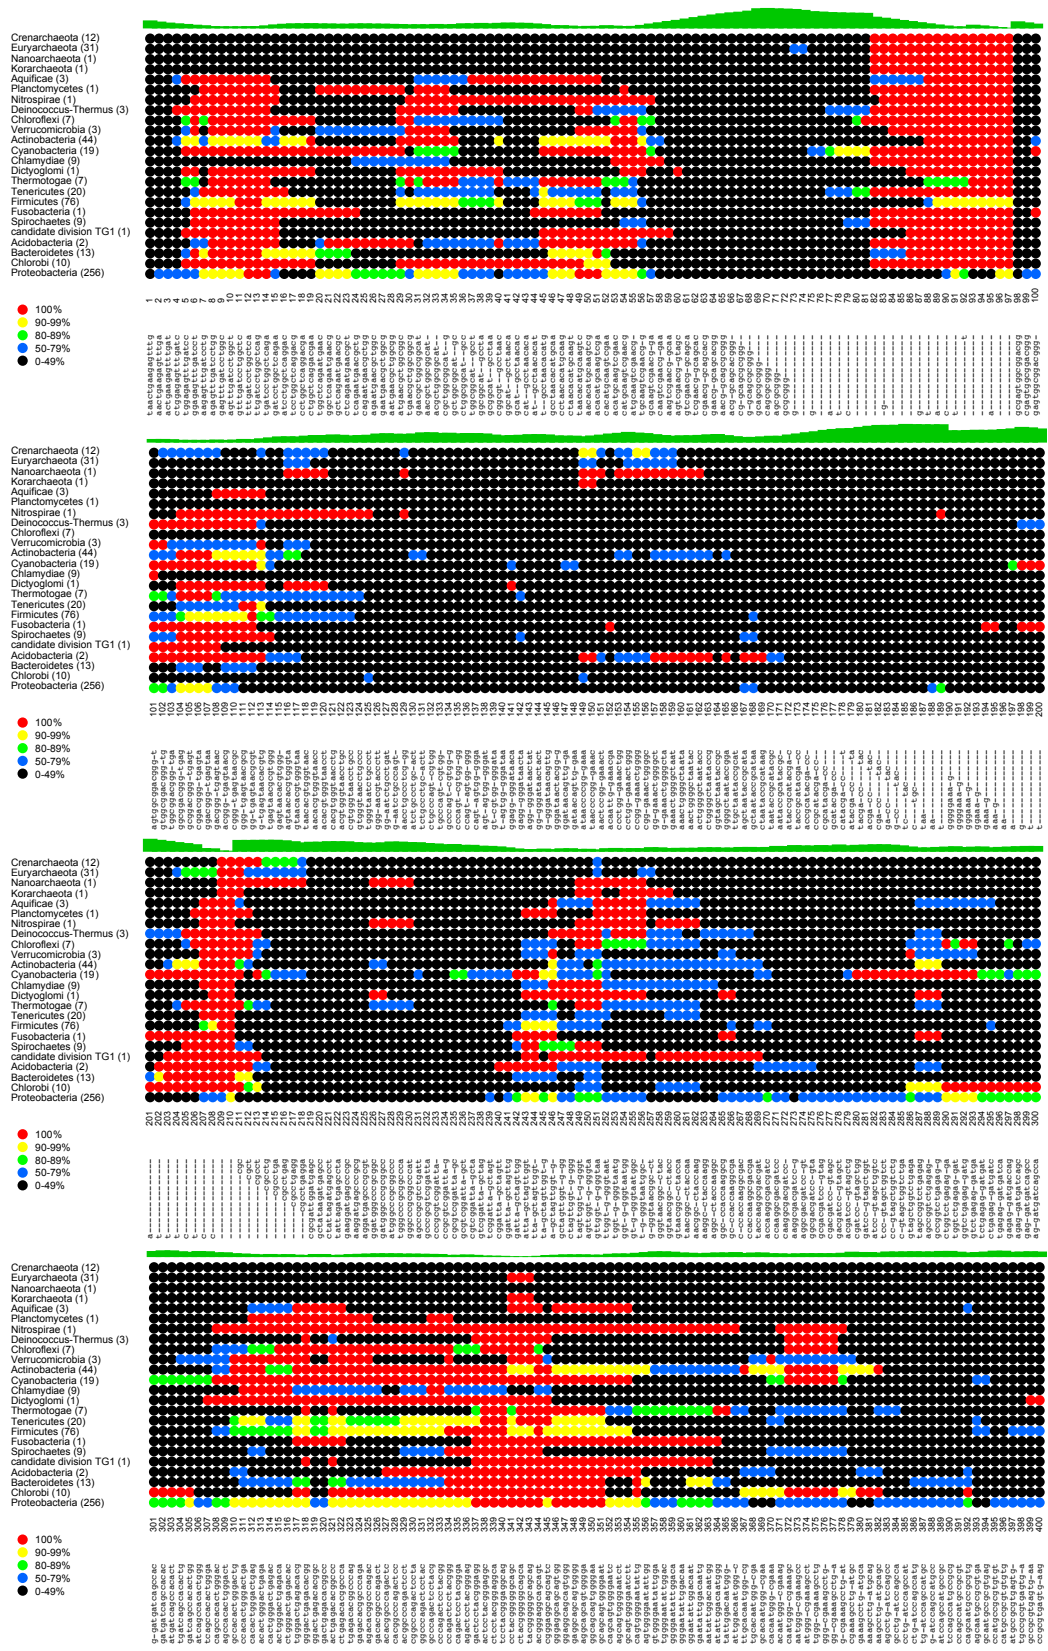

**Fig. S1.** A complete plot of the consensus sequence in each window and the coverage rates for each phylum from the 531 16S rRNA genes of genome-sequenced strains. Some consensus sequences contain continuous gaps (-) with several bp in lengths, indicating the presence of inserted sequences in particular strains. See the legend to Fig. 1 for the dot colors and the bar graph.

Crenarchaeota (12)  
 Euryarchaeota (31)  
 Nanoarchaeota (1)  
 Korarchaeota (1)  
 Aquificae (3)  
 Planctomycetes (1)  
 Nitrospirae (1)  
 Deinococcus-Thermus (3)  
 Chloroflexi (7)  
 Verrucomicrobia (3)  
 Actinobacteria (44)  
 Cyanobacteria (19)  
 Chlamydiae (9)  
 Dicytiomoni (1)  
 Thermotogae (7)  
 Tenericutes (20)  
 Firmicutes (76)  
 Fusobacteria (1)  
 Spirochaetes (9)  
 candidate division TG1 (1)  
 Acidobacteria (2)  
 Bacteroidetes (13)  
 Chlorobi (10)  
 Proteobacteria (256)

● 100%  
 ● 90-99%  
 ● 80-89%  
 ● 50-79%  
 ● 0-49%

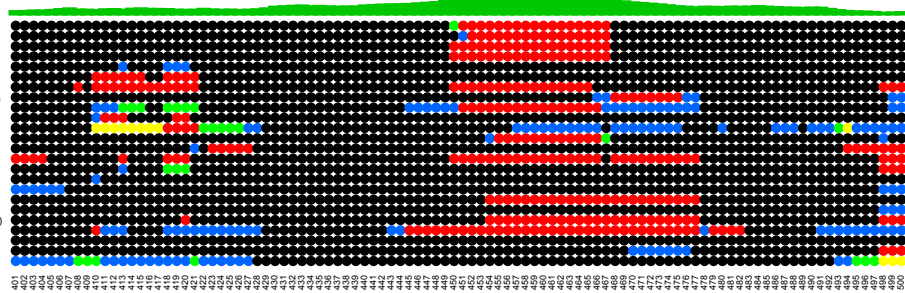

Crenarchaeota (12)  
 Euryarchaeota (31)  
 Nanoarchaeota (1)  
 Korarchaeota (1)  
 Aquificae (3)  
 Planctomycetes (1)  
 Nitrospirae (1)  
 Deinococcus-Thermus (3)  
 Chloroflexi (7)  
 Verrucomicrobia (3)  
 Actinobacteria (44)  
 Cyanobacteria (19)  
 Chlamydiae (9)  
 Dicytiomoni (1)  
 Thermotogae (7)  
 Tenericutes (20)  
 Firmicutes (76)  
 Fusobacteria (1)  
 Spirochaetes (9)  
 candidate division TG1 (1)  
 Acidobacteria (2)  
 Bacteroidetes (13)  
 Chlorobi (10)  
 Proteobacteria (256)

● 100%  
 ● 90-99%  
 ● 80-89%  
 ● 50-79%  
 ● 0-49%

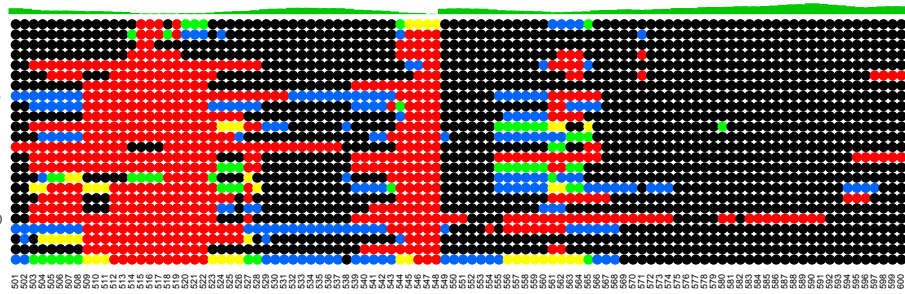

Crenarchaeota (12)  
 Euryarchaeota (31)  
 Nanoarchaeota (1)  
 Korarchaeota (1)  
 Aquificae (3)  
 Planctomycetes (1)  
 Nitrospirae (1)  
 Deinococcus-Thermus (3)  
 Chloroflexi (7)  
 Verrucomicrobia (3)  
 Actinobacteria (44)  
 Cyanobacteria (19)  
 Chlamydiae (9)  
 Dicytiomoni (1)  
 Thermotogae (7)  
 Tenericutes (20)  
 Firmicutes (76)  
 Fusobacteria (1)  
 Spirochaetes (9)  
 candidate division TG1 (1)  
 Acidobacteria (2)  
 Bacteroidetes (13)  
 Chlorobi (10)  
 Proteobacteria (256)

● 100%  
 ● 90-99%  
 ● 80-89%  
 ● 50-79%  
 ● 0-49%

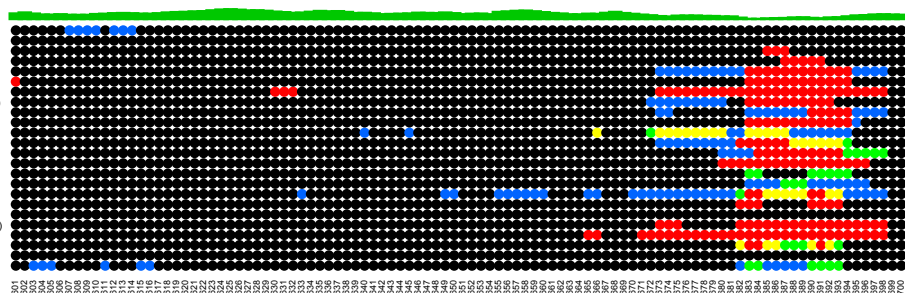

Crenarchaeota (12)  
 Euryarchaeota (31)  
 Nanoarchaeota (1)  
 Korarchaeota (1)  
 Aquificae (3)  
 Planctomycetes (1)  
 Nitrospirae (1)  
 Deinococcus-Thermus (3)  
 Chloroflexi (7)  
 Verrucomicrobia (3)  
 Actinobacteria (44)  
 Cyanobacteria (19)  
 Chlamydiae (9)  
 Dicytiomoni (1)  
 Thermotogae (7)  
 Tenericutes (20)  
 Firmicutes (76)  
 Fusobacteria (1)  
 Spirochaetes (9)  
 candidate division TG1 (1)  
 Acidobacteria (2)  
 Bacteroidetes (13)  
 Chlorobi (10)  
 Proteobacteria (256)

● 100%  
 ● 90-99%  
 ● 80-89%  
 ● 50-79%  
 ● 0-49%

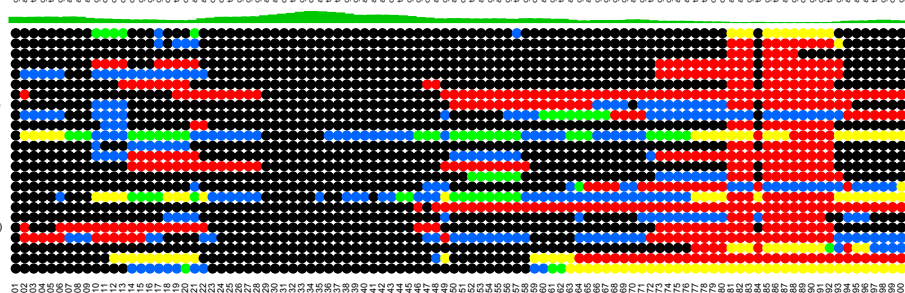

Fig. S1. Continued.

Crenarchaeota (12)  
 Euryarchaeota (31)  
 Nanoarchaeota (1)  
 Korarchaeota (1)  
 Aquificae (3)  
 Planctomycetes (1)  
 Nitrospirae (1)  
 Deinococcus-Thermus (3)  
 Chloroflexi (7)  
 Verrucomicrobia (3)  
 Actinobacteria (44)  
 Cyanobacteria (19)  
 Chlamydiae (9)  
 Dictyoglomi (1)  
 Thermotogae (7)  
 Tenericutes (20)  
 Firmicutes (76)  
 Fusobacteria (1)  
 Spirochaetes (9)  
 candidate division TG1 (1)  
 Acidobacteria (2)  
 Bacteroidetes (13)  
 Chlorobi (10)  
 Proteobacteria (256)

● 100%  
 ● 90-99%  
 ● 80-89%  
 ● 50-79%  
 ● 0-49%

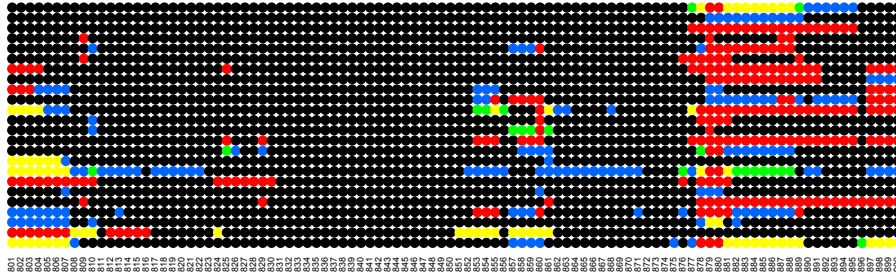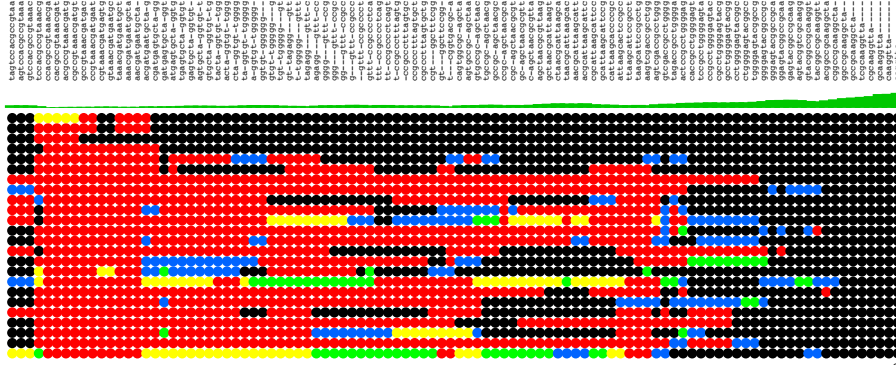

● 100%  
 ● 90-99%  
 ● 80-89%  
 ● 50-79%  
 ● 0-49%

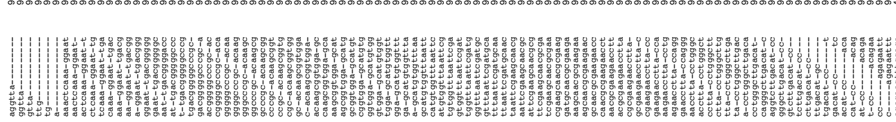

Crenarchaeota (12)  
 Euryarchaeota (31)  
 Nanoarchaeota (1)  
 Korarchaeota (1)  
 Aquificae (3)  
 Planctomycetes (1)  
 Nitrospirae (1)  
 Deinococcus-Thermus (3)  
 Chloroflexi (7)  
 Verrucomicrobia (3)  
 Actinobacteria (44)  
 Cyanobacteria (19)  
 Chlamydiae (9)  
 Dictyoglomi (1)  
 Thermotogae (7)  
 Tenericutes (20)  
 Firmicutes (76)  
 Fusobacteria (1)  
 Spirochaetes (9)  
 candidate division TG1 (1)  
 Acidobacteria (2)  
 Bacteroidetes (13)  
 Chlorobi (10)  
 Proteobacteria (256)

● 100%  
 ● 90-99%  
 ● 80-89%  
 ● 50-79%  
 ● 0-49%

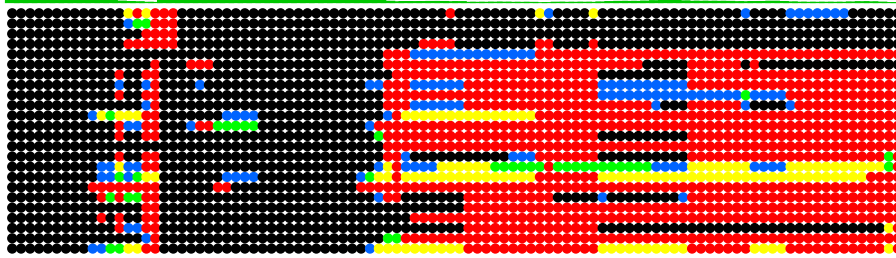

Crenarchaeota (12)  
 Euryarchaeota (31)  
 Nanoarchaeota (1)  
 Korarchaeota (1)  
 Aquificae (3)  
 Planctomycetes (1)  
 Nitrospirae (1)  
 Deinococcus-Thermus (3)  
 Chloroflexi (7)  
 Verrucomicrobia (3)  
 Actinobacteria (44)  
 Cyanobacteria (19)  
 Chlamydiae (9)  
 Dictyoglomi (1)  
 Thermotogae (7)  
 Tenericutes (20)  
 Firmicutes (76)  
 Fusobacteria (1)  
 Spirochaetes (9)  
 candidate division TG1 (1)  
 Acidobacteria (2)  
 Bacteroidetes (13)  
 Chlorobi (10)  
 Proteobacteria (256)

● 100%  
 ● 90-99%  
 ● 80-89%  
 ● 50-79%  
 ● 0-49%

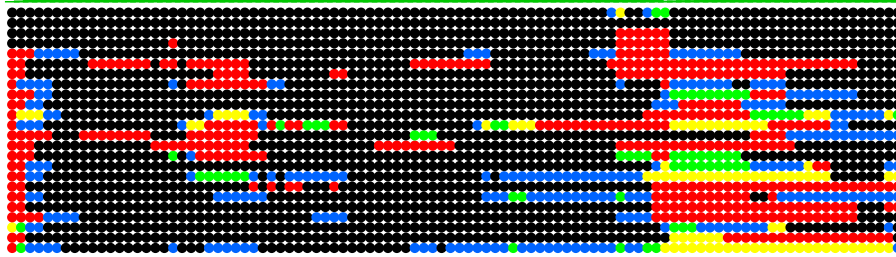

Fig. S1. Continued.

Crenarchaeota (12)  
 Euryarchaeota (31)  
 Nanoarchaeota (1)  
 Korarchaeota (1)  
 Aquificae (3)  
 Planctomycetes (1)  
 Nitrospirae (1)  
 Deinococcus-Thermus (3)  
 Chloroflexi (7)  
 Verrucomicrobia (3)  
 Actinobacteria (44)  
 Cyanobacteria (19)  
 Chlamydiae (9)  
 Dicytogiomi (1)  
 Thermotogae (7)  
 Tenereulites (20)  
 Firmicutes (76)  
 Fusobacteria (1)  
 Spirochaetes (9)  
 candidate division TG1 (1)  
 Acidobacteria (2)  
 Bacteroidetes (13)  
 Chlorobi (10)  
 Proteobacteria (256)

● 100%  
 ● 90-99%  
 ● 80-89%  
 ● 50-79%  
 ● 0-49%

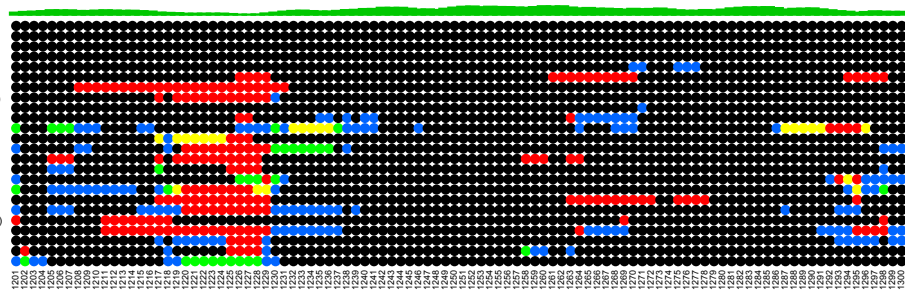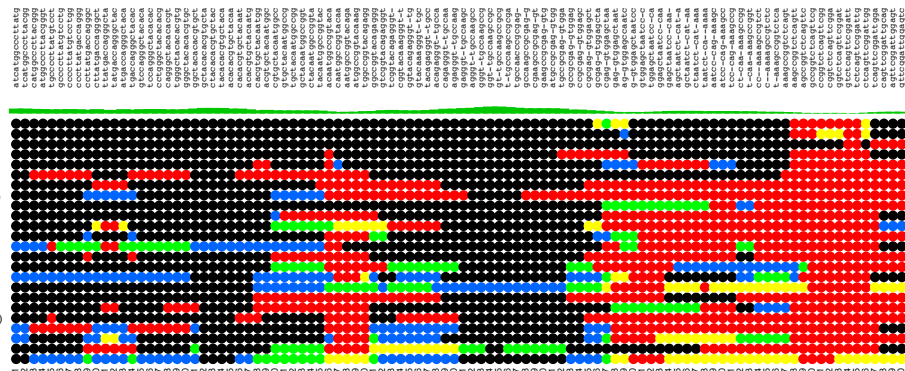

● 100%  
 ● 90-99%  
 ● 80-89%  
 ● 50-79%  
 ● 0-49%

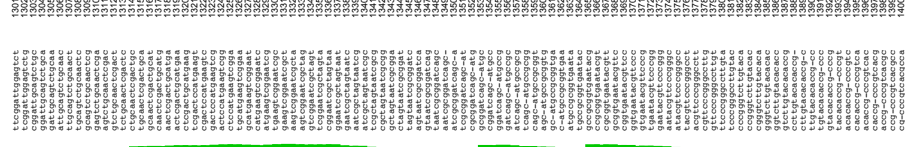

Crenarchaeota (12)  
 Euryarchaeota (31)  
 Nanoarchaeota (1)  
 Korarchaeota (1)  
 Aquificae (3)  
 Planctomycetes (1)  
 Nitrospirae (1)  
 Deinococcus-Thermus (3)  
 Chloroflexi (7)  
 Verrucomicrobia (3)  
 Actinobacteria (44)  
 Cyanobacteria (19)  
 Chlamydiae (9)  
 Dicytogiomi (1)  
 Thermotogae (7)  
 Tenereulites (20)  
 Firmicutes (76)  
 Fusobacteria (1)  
 Spirochaetes (9)  
 candidate division TG1 (1)  
 Acidobacteria (2)  
 Bacteroidetes (13)  
 Chlorobi (10)  
 Proteobacteria (256)

● 100%  
 ● 90-99%  
 ● 80-89%  
 ● 50-79%  
 ● 0-49%

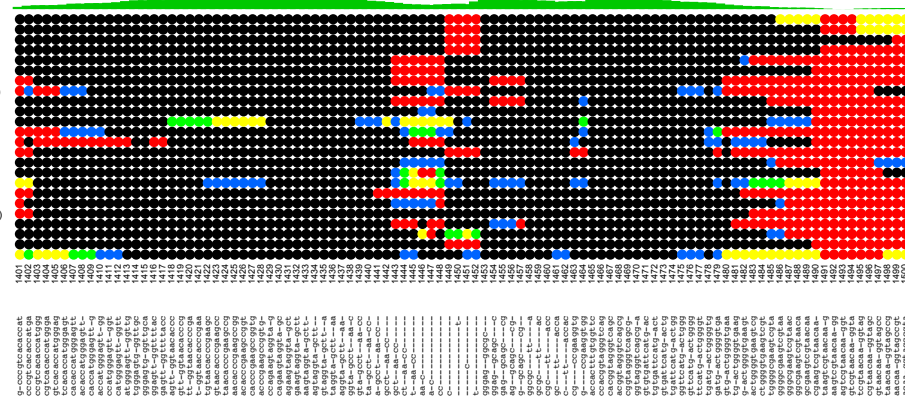

Crenarchaeota (12)  
 Euryarchaeota (31)  
 Nanoarchaeota (1)  
 Korarchaeota (1)  
 Aquificae (3)  
 Planctomycetes (1)  
 Nitrospirae (1)  
 Deinococcus-Thermus (3)  
 Chloroflexi (7)  
 Verrucomicrobia (3)  
 Actinobacteria (44)  
 Cyanobacteria (19)  
 Chlamydiae (9)  
 Dicytogiomi (1)  
 Thermotogae (7)  
 Tenereulites (20)  
 Firmicutes (76)  
 Fusobacteria (1)  
 Spirochaetes (9)  
 candidate division TG1 (1)  
 Acidobacteria (2)  
 Bacteroidetes (13)  
 Chlorobi (10)  
 Proteobacteria (256)

● 100%  
 ● 90-99%  
 ● 80-89%  
 ● 50-79%  
 ● 0-49%

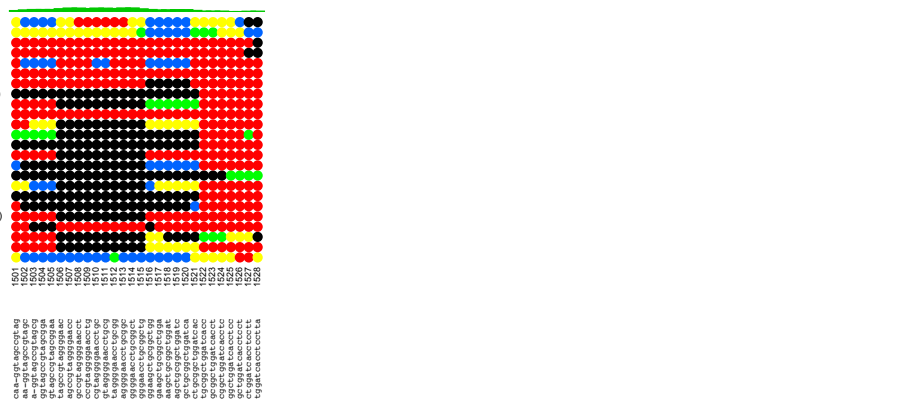

Fig. S1. Continued.
