# Supplementary material for: Design and Experimental Application of a Novel Non-Degenerate Universal Primer Set that Amplifies Prokaryotic 16S rRNA Genes with a Low Possibility to Amplify Eukaryotic rRNA Genes
Source: PubMed Central journal article supplement (PMC3989492; doi:10.1093/dnares/dst052), 2013-11-25
Supplement: supp_dst052_dst052supp_fig3.pdf [file supp_dst052_dst052supp_fig3.pdf]

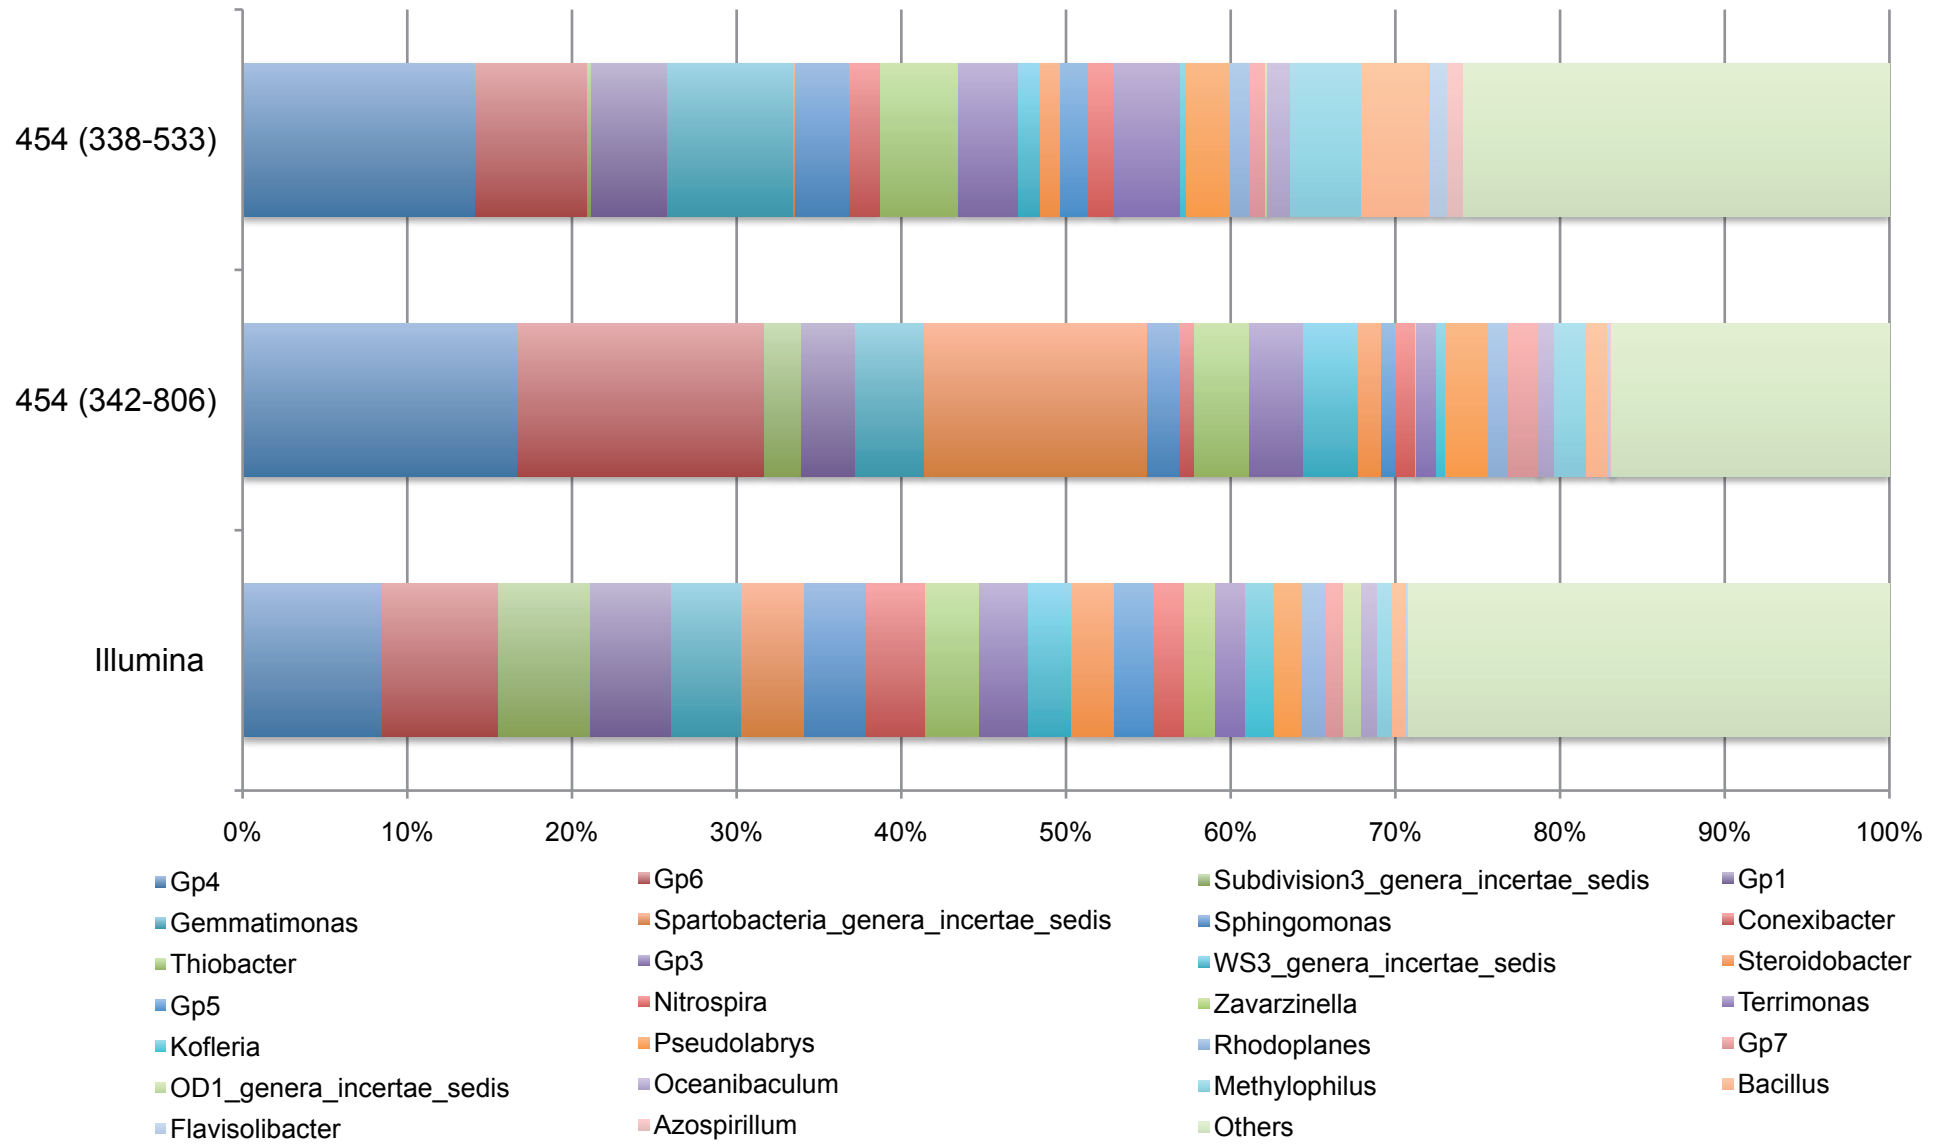

**Fig. S3.** 16S rRNA-based genus-level taxonomic compositions by the 338F-533R and 342F-806R amplicon sequencing and by the Illumina metagenomic sequencing. The top 26 genera that were found among the top 20 most-abundant genera in the three experiments are represented.
